# Supplementary material for: A reusable ratiometric fluorescent probe for the detection and removal of doxycycline antibiotic demonstrated by environmental sample investigations
Source: Royal Society of Chemistry journal article supplement (doi:10.1039/d2dt02480b), 2022-01-01
Supplement: d2dt02480b1.pdf [file d2dt02480b1.pdf]

## Supporting Information

### Reusable Ratiometric Fluorescence Probe for Tetracycline Antibiotics Detection and High-Efficient Removal from Environmental Water

Hongxia Chen,<sup>a</sup> Chao Yuan,<sup>\*a</sup> Junxiang Peng,<sup>a</sup> Mingtai Sun,<sup>a</sup> Shaoquan Liu,<sup>b</sup> Dejian Huang,<sup>b</sup> Suhua Wang<sup>\*a</sup>

<sup>a</sup> Guangdong Provincial Key Laboratory of Petrochemical Pollution Processes and Control, School of Environmental Science and Engineering, Guangdong University of Petrochemical Technology, Maoming, 525000, People's Republic of China

<sup>b</sup> Department of Food Science and Technology, National University of Singapore, 2 Science Drive 2, 117542, Singapore

\*Corresponding author:

Suhua Wang, E-mail: [wangsh@gdupt.edu.cn](mailto:wangsh@gdupt.edu.cn)

Chao Yuan, E-mail: [yuanchao@gdupt.edu.cn](mailto:yuanchao@gdupt.edu.cn)

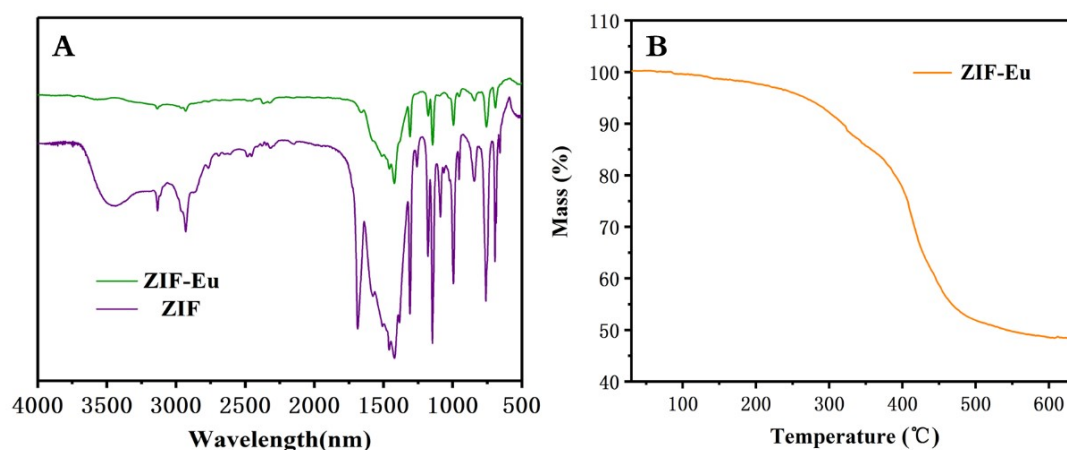

**Figure S1.** (A) FT-IR spectrum of the ZIF and ZIF-Eu taking KBr as the background peak. (B) TGA of the ZIF-Eu.

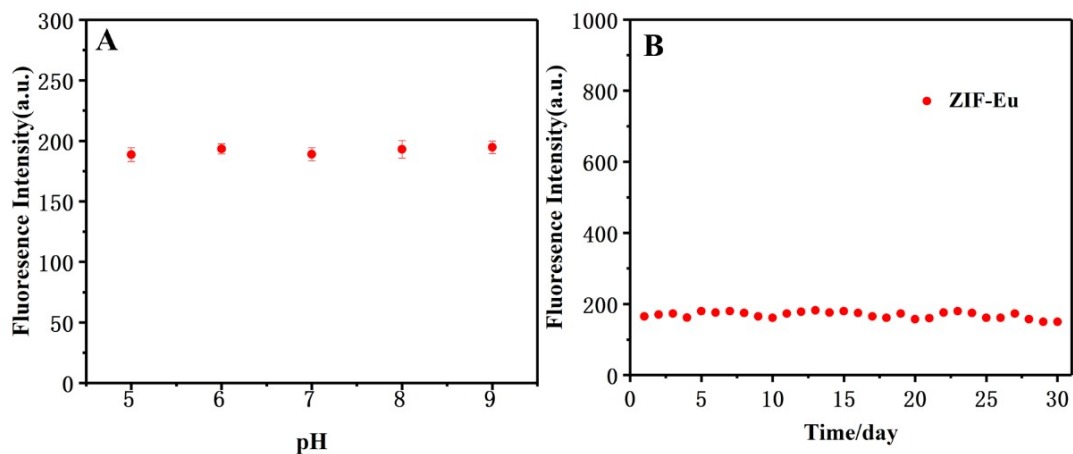

**Figure S2.** (A) Fluorescence spectra of ZIF-Eu (0.025 mg/mL) in Tris-HCl buffer solution (pH = 5, 6, 7, 8, and 9). (B) Fluorescence stability of the ZIF-Eu in Tris-HCl buffer solution (pH = 8).

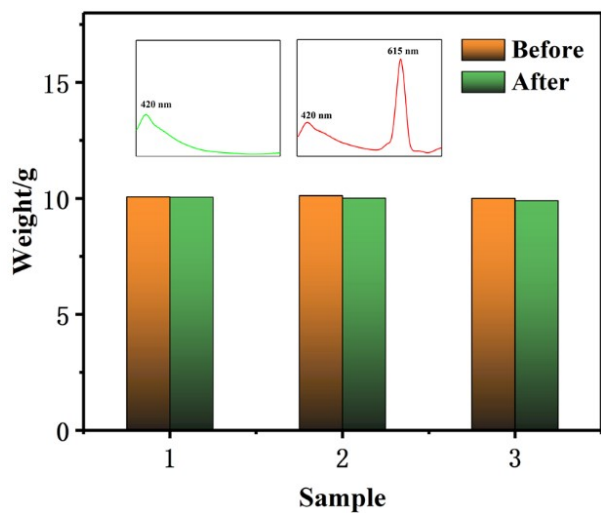

**Figure S3.** weight comparison of ZIF-Eu nanocomposite before and after regeneration. Inset represented the fluorescence properties of the material before and after regeneration.
